# Supplementary material
Source: HighWire-hosted journal article supplement (https://drc.bmj.com/content/4/1/e000185)

Physical Activity, Sedentary Behaviors and the Incidence of Type 2 Diabetes Mellitus: The Multi-Ethnic Study of Atherosclerosis (MESA)

Running Title: Physical Activity, Sedentary Behavior and Incident Diabetes

Joshua J. Joseph (1), Justin B. Echouffo-Tcheugui (2), Sherita H. Golden (1), Haiying Chen (3,4), Nancy Swords Jenny (5), Mercedes R. Carnethon (6), David Jacobs Jr. (7), Gregory L. Burke (3), Dhananjay Vaidya (1), Pamela Ouyang (1) and Alain G. Bertoni (3)

Online-Only Supplemental Material – TABLES & FIGURES

Supplementary Table S1. The Association between Activity measures and Incident Type 2 Diabetes in All Participants adjusted for reciprocal activity measures

| Activity Measures*         |              | Hazard Ratio among All Participants |                   |                   |
|----------------------------|--------------|-------------------------------------|-------------------|-------------------|
|                            |              | Unadjusted                          | Model 1†          | Model 2‡          |
| Moderate-Vigorous PA§      | Quartile 1   | Ref.                                | Ref.              | Ref.              |
|                            | Quartile 2   | 0.74 (0.59, 0.92)                   | 0.78 (0.63, 0.97) | 0.78 (0.63, 0.97) |
|                            | Quartile 3   | 0.77 (0.63, 0.96)                   | 0.78 (0.63, 0.97) | 0.79 (0.64, 0.98) |
|                            | Quartile 4   | 0.88 (0.71, 1.08)                   | 0.84 (0.68, 1.04) | 0.86 (0.69, 1.06) |
| Leisure Sedentary Behavior | 0-2 hours    | Ref.                                | Ref.              | Ref.              |
|                            | 2.01-4 hours | 1.19 (0.98, 1.45)                   | 1.21 (1.00, 1.48) | 1.21 (1.00, 1.47) |
|                            | 4.01-6 hours | 1.46 (1.17, 1.83)                   | 1.43 (1.13, 1.80) | 1.44 (1.14, 1.81) |
|                            | >6 hours     | 1.70 (1.31, 2.19)                   | 1.65 (1.26, 2.14) | 1.66 (1.27, 2.15) |

\*Activity measures in MET-hours/week, unless noted.

†Model 1: adjusted for age, race, gender, education, current occupation status, study site, current smoking, systolic blood pressure and current hypertension medication usage

‡Model 2 Moderate-Vigorous PA analysis adjusted for Model 1+ hours/day of leisure sedentary behavior

§Model 2 Leisure Sedentary Behavior analysis adjusted for Model 1 + MET-hours/week of moderate-vigorous PA

§ Moderate-Vigorous PA quartile ranges (MET-hours/week):

Quartile 1 (0.00-34.25), Quartile 2 (34.26-68.75), Quartile 3 (68.76-125.5), Quartile 4 (125.51-1722.0)

Supplementary Table S2. Baseline Characteristics of Participants by Incident Type 2 Diabetes Mellitus in the Multi-Ethnic Study of Atherosclerosis 2000-2012

| Characteristic*                                  | All participants<br>n=5,829 | No<br>n=5,174 | Yes<br>n=655 | p-value  |
|--------------------------------------------------|-----------------------------|---------------|--------------|----------|
| Age                                              | 61.8 (10.3)                 | 61.9 (10.4)   | 60.8 (9.5)   | p=0.0074 |
| Female                                           | 53.6%                       | 53.8%         | 51.7%        | p=0.298  |
| Education $\geq$ Bachelor's Degree               | 37.3%                       | 38.0%         | 32.2%        | p=0.097  |
| Occupation, Full Time Employment                 | 40.0%                       | 40.0%         | 39.8%        | p=0.176  |
| Current Smoking                                  | 14.4%                       | 14.5%         | 14.3%        | p=0.93   |
| Current Alcohol use                              | 58.1%                       | 58.6%         | 54.3%        | p=0.11   |
| Exercise Physical Activity (PA)                  | 26.4 (39.4)                 | 26.6 (39.3)   | 24.4 (40.1)  | p=0.18   |
| Moderate-Vigorous PA                             | 97.2 (99.3)                 | 97.0 (97.1)   | 98.5 (114.6) | p=0.7176 |
| Any Vigorous PA                                  | 32.8%                       | 33.4%         | 28.5%        | p=0.012  |
| Leisure Sedentary behavior (hours/day)           | 3.4 (2.2)                   | 3.3 (2.2)     | 3.7 (2.3)    | p=0.0004 |
| TV watching (hours/day)                          | 2.1 (1.5)                   | 2.0 (1.5)     | 2.3 (1.6)    | P<0.0001 |
| Activity Score†                                  | 4.0 (1.6)                   | 4.0 (1.6)     | 3.9 (1.6)    | p=0.0162 |
| Walking Pace‡                                    |                             |               |              |          |
| Walking <2mph                                    | 25.8%                       | 25.0%         | 32.2%        |          |
| Average Pace                                     | 50.6%                       | 50.9%         | 48.1%        |          |
| Walking $\geq$ 4mph                              | 23.6%                       | 24.1%         | 19.5%        | P<0.0001 |
| Body-mass Index (kilograms/meter <sup>2</sup> )§ | 28.0 (5.3)                  | 27.6 (5.1)    | 31.0 (5.8)   | P<0.0001 |
| Waist circumference (cm)                         | 97.1 (14.1)                 | 96.1 (13.8)   | 105.0 (14.1) | P<0.0001 |
| Hypertension medication                          | 33.3%                       | 31.9%         | 44.4%        | P<0.0001 |
| SBP (mmHg)                                       | 125.6 (21.2)                | 125.0 (21.3)  | 130.2 (20.3) | P<0.0001 |
| DBP (mmHg)                                       | 71.9 (10.3)                 | 71.6 (10.2)   | 74.0 (10.7)  | P<0.0001 |
| Glucose (mg/dl)                                  | 89.6 (10.5)                 | 88.1 (9.2)    | 101.1 (12.9) | P<0.0001 |
| Impaired Fasting Glucose (100-125 mg/dL)         | 15.6%                       | 10.9%         | 52.6%        | P<0.0001 |
| HOMA-IR                                          | 2.1 (1.4)                   | 2.0 (1.2)     | 3.3 (1.9)    | P<0.0001 |
| Family History of Diabetes                       | 34.4%                       | 32.5%         | 48.6%        | P<0.0001 |

\*Mean (SD) or percentages are listed and physical activity in MET-hours/week, unless noted.

†Activity score was created by coding quartiles of moderate to vigorous physical activity 1 (lowest quartile) to 4 (highest quartile) and reverse coding leisure sedentary behavior 3 (lowest quartile) to 0 (highest quartile).

‡ n =5,823 participants

§The body-mass index was calculated as the weight in kilograms divided by the square of the height in meters.

|| = 5,350 participants

Supplementary Table S3. Association between Physical Activity (PA), Sedentary behaviors and Activity score and Incident Type 2 Diabetes Mellitus Stratified by Categories of Body-mass Index and American Heart Association (AHA) Dietary Status\*

| Activity Measures                                 |                                 | Hazard Ratio by WHO categories† (95% CI) |                   |                   | Hazard Ratio by AHA Ideal Diet Status (‡) (95% CI) |                        |
|---------------------------------------------------|---------------------------------|------------------------------------------|-------------------|-------------------|----------------------------------------------------|------------------------|
|                                                   |                                 | BMI < 25                                 | BMI ≥ 25 & < 30   | BMI ≥ 30          | Poor                                               | Intermediate/<br>Ideal |
|                                                   |                                 | N=1,782                                  | n= 2,329          | n=1,712           | n= 2,683                                           | n= 2,657               |
| Walking Pace<br>(miles/hour)                      | none or casual<br>(<2mph)       | Ref.                                     | Ref.              | Ref.              | Ref.                                               | Ref.                   |
|                                                   | average<br>(2-3mph)             | 0.72 (0.42, 1.25)                        | 0.85 (0.63, 1.15) | 0.83 (0.66, 1.05) | 0.73 (0.57, 0.95)                                  | 0.81 (0.61, 1.08)      |
|                                                   | brisk or<br>striding<br>(>4mph) | 0.66 (0.34, 1.26)                        | 0.92 (0.64, 1.32) | 0.71 (0.51, 1.01) | 0.58 (0.41, 0.83)                                  | 0.76 (0.54, 1.07)      |
|                                                   | P for trend§                    | p=0.09                                   | p=0.30            | p<0.05            | p=0.001                                            | p=0.0134               |
| Exercise PA<br>(MET-<br>hours/week)               | Quartile 1                      | Ref.                                     | Ref.              | Ref.              | Ref.                                               | Ref.                   |
|                                                   | Quartile 2                      | 0.67 (0.36, 1.24)                        | 1.49 (1.04, 2.13) | 0.93 (0.70, 1.23) | 1.17 (0.87, 1.59)                                  | 0.91 (0.66, 1.25)      |
|                                                   | Quartile 3                      | 0.72 (0.39, 1.33)                        | 1.02 (0.69, 1.51) | 0.91 (0.68, 1.24) | 0.92 (0.66, 1.28)                                  | 0.81 (0.59, 1.13)      |
|                                                   | Quartile 4                      | 0.68 (0.37, 1.26)                        | 1.08 (0.73, 1.58) | 0.79 (0.57, 1.09) | 0.87 (0.62, 1.22)                                  | 0.66 (0.47, 0.93)      |
|                                                   | P for trend                     | p=0.17                                   | p=0.58            | p=0.14            | p=0.19                                             | p=0.01                 |
| Moderate -<br>Vigorous PA<br>(MET-<br>hours/week) | Quartile 1                      | Ref.                                     | Ref.              | Ref.              | Ref.                                               | Ref.                   |
|                                                   | Quartile 2                      | 0.83 (0.46, 1.48)                        | 0.63 (0.44, 0.90) | 1.08 (0.79, 1.48) | 0.70 (0.50, 0.99)                                  | 0.78 (0.58, 1.07)      |
|                                                   | Quartile 3                      | 0.69 (0.36, 1.33)                        | 0.81 (0.58, 1.14) | 0.80 (0.59, 1.10) | 0.77 (0.56, 1.07)                                  | 0.70 (0.51, 0.97)      |
|                                                   | Quartile 4                      | 0.96 (0.52, 1.78)                        | 0.70 (0.48, 1.00) | 0.99 (0.73, 1.33) | 0.95 (0.70, 1.29)                                  | 0.64 (0.46, 0.91)      |
|                                                   | P for trend                     | p=0.44                                   | p=0.06            | p=0.74            | p= 0.88                                            | p=0.014                |
| Vigorous<br>PA                                    | None                            | Ref.                                     | Ref.              | Ref.              | Ref.                                               | Ref.                   |
|                                                   | Any                             | 1.02 (0.62, 1.67)                        | 0.67 (0.50, 0.90) | 0.87 (0.67, 1.13) | 0.84 (0.64, 1.08)                                  | 0.71 (0.54, 0.94)      |
| Leisure<br>Sedentary<br>Behavior<br>(hours/day)   | 0-2 hours                       | Ref.                                     | Ref.              | Ref.              | Ref.                                               | Ref.                   |
|                                                   | 2.01-4 hours                    | 0.63 (0.37, 1.08)                        | 1.52 (1.11, 2.10) | 1.08 (0.81, 1.43) | 1.09 (0.82, 1.46)                                  | 1.28 (0.96, 1.70)      |
|                                                   | 4.01-6 hours                    | 0.83 (0.43, 1.61)                        | 1.43 (0.97, 2.12) | 1.43 (1.04, 1.98) | 1.33 (0.94, 1.87)                                  | 1.55 (1.10, 2.17)      |
|                                                   | >6 hours                        | 1.45 (0.71, 2.96)                        | 1.88 (1.19, 2.95) | 1.31 (0.91, 1.88) | 1.47 (0.99, 2.17)                                  | 1.50 (0.97, 2.30)      |

|                         | P for trend  | p=0.58            | p<0.01            | p=0.08            | p<0.01            | p<0.05            |
|-------------------------|--------------|-------------------|-------------------|-------------------|-------------------|-------------------|
| TV Watching (hours/day) | 0-2 hours    | Ref.              | Ref.              | Ref.              | Ref.              | Ref.              |
|                         | 2.01-4 hours | 0.51 (0.27, 0.96) | 1.22 (0.92, 1.63) | 1.18 (0.93, 1.51) | 1.00 (0.76, 1.30) | 1.36 (1.05, 1.78) |
|                         | 4.01-6 hours | 1.60 (0.75, 3.45) | 1.31 (0.84, 2.03) | 1.33 (0.93, 1.89) | 1.23 (0.84, 1.80) | 1.40 (0.92, 2.14) |
|                         | >6 hours     | N/A†              | 4.98 (1.8, 13.7)  | 1.74 (0.71, 4.24) | 2.98 (1.22, 7.31) | 2.67 (0.84, 8.45) |
|                         | P for trend  | p=0.91            | p<0.01            | p<0.05            | p<0.05            | p<0.001           |
| Activity Score §        | Category 1   | Ref.              | Ref.              | Ref.              | Ref.              | Ref.              |
|                         | Category 2   | 0.25 (0.07, 0.82) | 1.10 (0.64, 1.90) | 0.76 (0.48, 1.22) | 0.59 (0.35, 0.99) | 0.87 (0.53, 1.41) |
|                         | Category 3   | 0.56 (0.23, 1.33) | 0.85 (0.50, 1.45) | 0.72 (0.47, 1.10) | 0.66 (0.42, 1.05) | 0.75 (0.48, 1.19) |
|                         | Category 4   | 0.72 (0.32, 1.62) | 0.73 (0.44, 1.22) | 0.77 (0.52, 1.14) | 0.75 (0.49, 1.14) | 0.64 (0.41, 1.00) |
|                         | Category 5   | 0.70 (0.29, 1.64) | 0.81 (0.47, 1.40) | 0.84 (0.55, 1.28) | 0.74 (0.47, 1.17) | 0.70 (0.44, 1.12) |
|                         | Category 6   | 0.55 (0.21, 1.43) | 0.60 (0.33, 1.09) | 0.51 (0.31, 0.83) | 0.54 (0.33, 0.88) | 0.41 (0.24, 0.71) |
|                         | Category 7   | 0.60 (0.19, 1.87) | 0.59 (0.30, 1.17) | 0.61 (0.35, 1.07) | 0.69 (0.40, 1.20) | 0.43 (0.23, 0.83) |
|                         | P for trend  | p=0.84            | p<0.01            | p=0.35            | p=0.21            | p<0.01            |

\*Model 1 Adjusted: adjusted for age, race, gender, education, current occupation status, study site, current smoking, systolic blood pressure and current hypertension medication usage, (lower/upper bounds) of 95% confidence intervals.

†The body-mass index was calculated as the weight in kilograms divided by the square of the height in meters.

‡ American Heart Association Diet for Ideal Cardiovascular Health

§ P for trend calculated using the Log-rank test.

|| Activity score was created by coding quartiles of moderate to vigorous physical activity 1 (lowest quartile) to 4 (highest quartile) and reverse coding leisure sedentary behavior 3 (lowest quartile) to 0 (highest quartile).

¶ N/A is used to denote a lack of participants in a specific category.

Exercise PA quartile ranges (MET-hours/week) overall and stratified by WHO categories of BMI:

BMI Overall: Quartile 1 (0.00-3.13), Quartile 2 (3.14-14.00), Quartile 3 (14.01-35.00), Quartile 4 (35.01-557.00)

BMI < 25: Quartile 1 (0.00-4.38), Quartile 2 (4.39-16.63), Quartile 3 (16.64-37.44), Quartile 4 (37.45-621)

BMI ≥ 25 & < 30: Quartile 1 (0.00-3.50), Quartile 2 (3.51-15.75), Quartile 3 (15.76-36.75), Quartile 4 (36.76-557.00)

BMI ≥ 30: Quartile 1 (0.00-0.00), Quartile 2 (0.00-10.50), Quartile 3 (10.51-27.98), Quartile 4 (27.99-405)

Moderate-Vigorous PA quartile ranges (MET-hours/week) overall and stratified by WHO categories of BMI:

BMI Overall: Quartile 1 (0.00-35.25), Quartile 2 (35.26-69.91), Quartile 3 (69.92-124.50), Quartile 4 (124.51-1722)

BMI < 25: Quartile 1 (0.00-33.75), Quartile 2 (33.76-63.69), Quartile 3 (63.70-117.94), Quartile 4 (117.95-795.00)

BMI ≥ 25 & < 30: Quartile 1 (0.00-36.75), Quartile 2 (36.76-71.94), Quartile 3 (71.95-130.25), Quartile 4 (130.26-1722.00)

BMI ≥ 30: Quartile 1 (0.00-31.69), Quartile 2 (31.70-70.06), Quartile 3 (70.7-127.56), Quartile 4 (127.57-1125.00)

Exercise PA quartile ranges (MET-hours/week) overall and stratified by AHA Diet Status:

AHA Diet Status Overall: Quartile 1 (0.00-2.75), Quartile 2 (2.76-14.00), Quartile 3 (14.01-34.88), Quartile 4 (34.89-621)

AHA Diet Status Poor: Quartile 1 (0.00-0.00), Quartile 2 (0.00-12.25), Quartile 3 (12.26-31.38), Quartile 4 (31.39-557)

AHA Diet Status Intermediate/Ideal: Quartile 1 (0.00-5.25), Quartile 2 (5.26-17.50), Quartile 3 (17.51-37.25), Quartile 4 (37.26-621.00)

Moderate-Vigorous PA quartile ranges (MET-hours/week) overall and stratified by AHA Diet Status

AHA Diet Status Overall: Quartile 1 (0.00-34.25), Quartile 2 (34.26-68.38), Quartile 3 (68.39-124.25), Quartile 4 (124.26-1722.00)

AHA Diet Status Poor: Quartile 1 (0.00-35.00), Quartile 2 (35.01-72.50), Quartile 3 (72.51-135.00), Quartile 4 (135.01-1722.00)

AHA Diet Status Intermediate/Ideal: Quartile 1 (0.00-33.50), Quartile 2 (33.51-64.00), Quartile 3 (64.01-116.25), Quartile 4 (116.26-942.50)

Supplementary Table S4: Likelihood Ratio Test for Interaction among Age, Gender, Race/Ethnicity, BMI, Family History of Diabetes and American Heart Association (AHA) Dietary Intake

| Likelihood Ratio Test for Interaction Term |        |        |                |        |                            |                    |
|--------------------------------------------|--------|--------|----------------|--------|----------------------------|--------------------|
| P for interaction                          | Age    | Gender | Race/Ethnicity | BMI    | Family History of Diabetes | AHA Dietary Intake |
| Total leisure sedentary activity           | 0.0544 | 0.4893 | 0.0304         | 0.1291 | 0.0999                     | 0.8476             |
| Television viewing time                    | 0.9366 | 0.6432 | 0.5828         | 0.0201 | 0.0498                     | 0.3082             |
| MVPA                                       | 0.9651 | 0.7400 | 0.8986         | 0.3944 | 0.5785                     | 0.2048             |
| Exercise PA                                | 0.8490 | 0.1492 | 0.2286         | 0.9210 | 0.3915                     | 0.2279             |
| Any Vigorous PA                            | 0.3037 | 0.2183 | 0.3623         | 0.0525 | 0.9022                     | 0.6860             |
| Activity Score                             | 0.3728 | 0.9525 | 0.2428         | 0.2740 | 0.3694                     | 0.1428             |

Supplementary Table S5: Diabetes Mellitus Rates per 1000 Person-years for Activity Score\* by Race/Ethnicity

| Race/Ethnicity   | non-Hispanic white<br>n= 2,425 | Chinese American<br>n= 691 | African American<br>n= 1,503 | Hispanic American<br>n= 1,210 |
|------------------|--------------------------------|----------------------------|------------------------------|-------------------------------|
| Activity Score 1 | 17.4 (11.9, 25.6) †            | 18.9 (9.9, 36.4)           | 14.3 (9.0, 22.8)             | 17.5 (9.4, 32.6)              |
| Activity Score 2 | 7.3 (4.7, 11.3)                | 11.6 (6.3, 21.6)           | 14.1 (9.4, 21.0)             | 21.8 (14.4, 33.2)             |
| Activity Score 3 | 9.2 (6.8, 12.4)                | 9.1 (5.3, 15.6)            | 12.8 (9.0, 18.2)             | 17.1 (11.9, 24.6)             |
| Activity Score 4 | 7.0 (5.2, 9.4)                 | 10.1 (6.5, 15.9)           | 16.6 (13.0, 21.2)            | 16.2 (12.0, 21.7)             |
| Activity Score 5 | 8.3 (6.1, 11.4)                | 16.8 (10.6, 26.6)          | 15.0 (10.6, 21.3)            | 14.7 (10.3, 20.8)             |
| Activity Score 6 | 5.7 (3.6, 9.0)                 | 8.3 (3.9, 17.3)            | 10.4 (6.6, 16.3)             | 11.3 (7.5, 17.0)              |
| Activity Score 7 | 5.8 (3.1, 10.8)                | 9.6 (3.1, 29.7)            | 11.5 (6.4, 20.9)             | 12.6 (7.8, 20.2)              |

\* Activity score was created by coding quartiles of moderate to vigorous physical activity 1 (lowest quartile) to 4 (highest quartile) and reverse coding leisure sedentary behavior 3 (lowest quartile) to 0 (highest quartile).

†Estimated rates per 1000 person-years and (lower/upper bounds) of 95% confidence intervals



Supplementary Table S6. Association between Physical Activity (PA), Sedentary Behavior and Activity Score and Incident Type 2 Diabetes Stratified by Family History of Diabetes.\*

| Physical Activity (PA)†                         |                           | Family History of Diabetes (Model 1) n=5,289‡ |                   |
|-------------------------------------------------|---------------------------|-----------------------------------------------|-------------------|
|                                                 |                           | Yes                                           | No                |
|                                                 |                           | n= 1,840                                      | n= 3,449          |
| Walking Pace<br>(miles/hour)                    | none or casual (<2 mph)   | Ref.                                          | Ref.              |
|                                                 | average (2-4 mph)         | 0.81 (0.63, 1.05)                             | 0.73 (0.56, 0.94) |
|                                                 | brisk or striding (>4mph) | 0.73 (0.52, 1.01)                             | 0.64 (0.46, 0.88) |
|                                                 | P for trend§              | p<0.05                                        | p<0.0001          |
| Exercise PA                                     | Quartile 1 (0.00-3.13)    | Ref.                                          | Ref.              |
|                                                 | Quartile 2 (3.14-14.00)   | 1.07 (0.79, 1.46)                             | 0.86 (0.64, 1.15) |
|                                                 | Quartile 3 (14.01-35.00)  | 1.11 (0.81, 1.51)                             | 0.63 (0.45, 0.86) |
|                                                 | Quartile 4 (35.01-557.00) | 0.74 (0.52, 1.06)                             | 0.73 (0.53, 0.99) |
|                                                 | P for trend               | p=0.06                                        | p<0.01            |
| Moderate -<br>Vigorous PA                       | Quartile 1 (0.00-35.25)   | Ref.                                          | Ref.              |
|                                                 | Quartile 2 (35.26-69.91)  | 1.12 (0.81, 1.54)                             | 0.58 (0.42, 0.80) |
|                                                 | Quartile 3 (69.92-124.50) | 1.01 (0.72, 1.40)                             | 0.65 (0.48, 0.88) |
|                                                 | Quartile 4 (124.51-1722)  | 1.02 (0.74, 1.41)                             | 0.74 (0.55, 1.00) |
|                                                 | P for trend               | p=1.00                                        | p=0.06            |
| Vigorous<br>PA                                  | None                      | Ref.                                          | Ref.              |
|                                                 | Any                       | 0.78 (0.60, 1.01)                             | 0.77 (0.59, 1.00) |
| Leisure<br>Sedentary<br>behavior<br>(hours/day) | 0-2 hours                 | Ref.                                          | Ref.              |
|                                                 | 2.01-4 hours              | 1.54 (1.15, 2.07)                             | 0.93 (0.71, 1.23) |
|                                                 | 4.01-6 hours              | 1.43 (1.00, 2.04)                             | 1.32 (0.96, 1.82) |
|                                                 | >6 hours                  | 1.96 (1.34, 2.87)                             | 1.34 (0.91, 1.97) |
|                                                 | P for trend               | p<0.01                                        | p<0.01            |
| TV Watching<br>(hours/day)                      | 0-2 hours                 | Ref.                                          | Ref.              |
|                                                 | 2.01-4 hours              | 1.30 (1.01, 1.67)                             | 0.99 (0.76, 1.28) |
|                                                 | 4.01-6 hours              | 1.65 (1.16, 2.37)                             | 1.30 (0.88, 1.92) |
|                                                 | >6 hours                  | 1.72 (0.42, 6.99)                             | 3.55 (1.66, 7.60) |
|                                                 | P for trend*              | p<0.001                                       | p<0.001           |
| Activity<br>Score                               | Category 1                | Ref.                                          | Ref.              |
|                                                 | Category 2                | 1.07 (0.64, 1.81)                             | 0.61 (0.38, 0.96) |
|                                                 | Category 3                | 1.13 (0.70, 1.83)                             | 0.57 (0.37, 0.87) |
|                                                 | Category 4                | 1.13 (0.72, 1.78)                             | 0.57 (0.38, 0.85) |
|                                                 | Category 5                | 1.07 (0.66, 1.72)                             | 0.56 (0.36, 0.87) |
|                                                 | Category 6                | 0.58 (0.33, 1.02)                             | 0.51 (0.32, 0.81) |
|                                                 | Category 7                | 0.78 (0.42, 1.45)                             | 0.47 (0.27, 0.83) |
|                                                 | P for trend               | p=0.09                                        | p<0.01            |

Supplementary Table S6. Association between Physical Activity (PA), Sedentary Behavior and Activity Score and Incident Type 2 Diabetes Stratified by Family History of Diabetes.

\*Model 1 Adjusted: adjusted for age, race, gender, education, current occupation status, study site, current smoking, systolic blood pressure and current hypertension medication usage, (lower/upper bounds) of 95% confidence intervals.

† Physical activity data in MET-hours/week, unless noted.

‡61 participants excluded from analysis due to unknown family history of diabetes.

§P for trend calculated using the Log-rank test.

|| Activity score was created by coding quartiles of moderate to vigorous physical activity 1 (lowest quartile) to 4 (highest quartile) and reverse coding leisure sedentary behavior 3 (lowest quartile) to 0 (highest quartile).

Exercise PA quartile ranges (MET-hours/week) overall and stratified by family history of diabetes:

Overall: Quartile 1 (0.00-3.13), Quartile 2 (3.14-14.00), Quartile 3 (14.01-35.00), Quartile 4 (35.01-557.00)

Family History of Diabetes: Quartile 1 (0.00-2.50), Quartile 2 (2.51-14.00), Quartile 3 (14.01-32.38), Quartile 4 (32.39-557.00)

No Family History of Diabetes: Quartile 1 (0.00-3.50), Quartile 2 (3.51-14.00), Quartile 3 (14.01-35.25), Quartile 4 (35.26-513.63)

Moderate-Vigorous PA quartile ranges (MET-hours/week) overall and stratified by family history of diabetes:

Overall: Quartile 1 (0.00-35.25), Quartile 2 (35.26-69.91), Quartile 3 (69.92-124.50), Quartile 4 (124.51-1722)

Family History of Diabetes: Quartile 1 (0-36.00), Quartile 2 (36.01-72.00), Quartile 3 (72.01-130.38), Quartile 4 (130.39-1722.00)

No Family History of Diabetes: Quartile 1 (0.00-35.00), Quartile 2 (35.01-68.88), Quartile 3 (68.89-121.50), Quartile 4 (121.51-942.50)

Supplementary Figure S1. Moderate-Vigorous Physical Activity (PA) (MET-hours/week) versus Total Leisure Sedentary Behavior (hours/day) and Incident Type 2 Diabetes Mellitus from 2000-2012. Data are included for 5,829 participants followed for a median of 11.1 years. Using Cox proportional hazards modeling, we calculated the hazard ratios using the highest moderate-vigorous PA, lowest sedentary behavior category as the referent group. The model included the moderate-vigorous PA-sedentary behavior category, study site, age, race, sex, education, current occupation status, systolic blood pressure, antihypertensive medication use, and smoking. \* $p < 0.05$ , \*\* $p < 0.01$  and \*\*\* $p < 0.001$  versus the referent category.

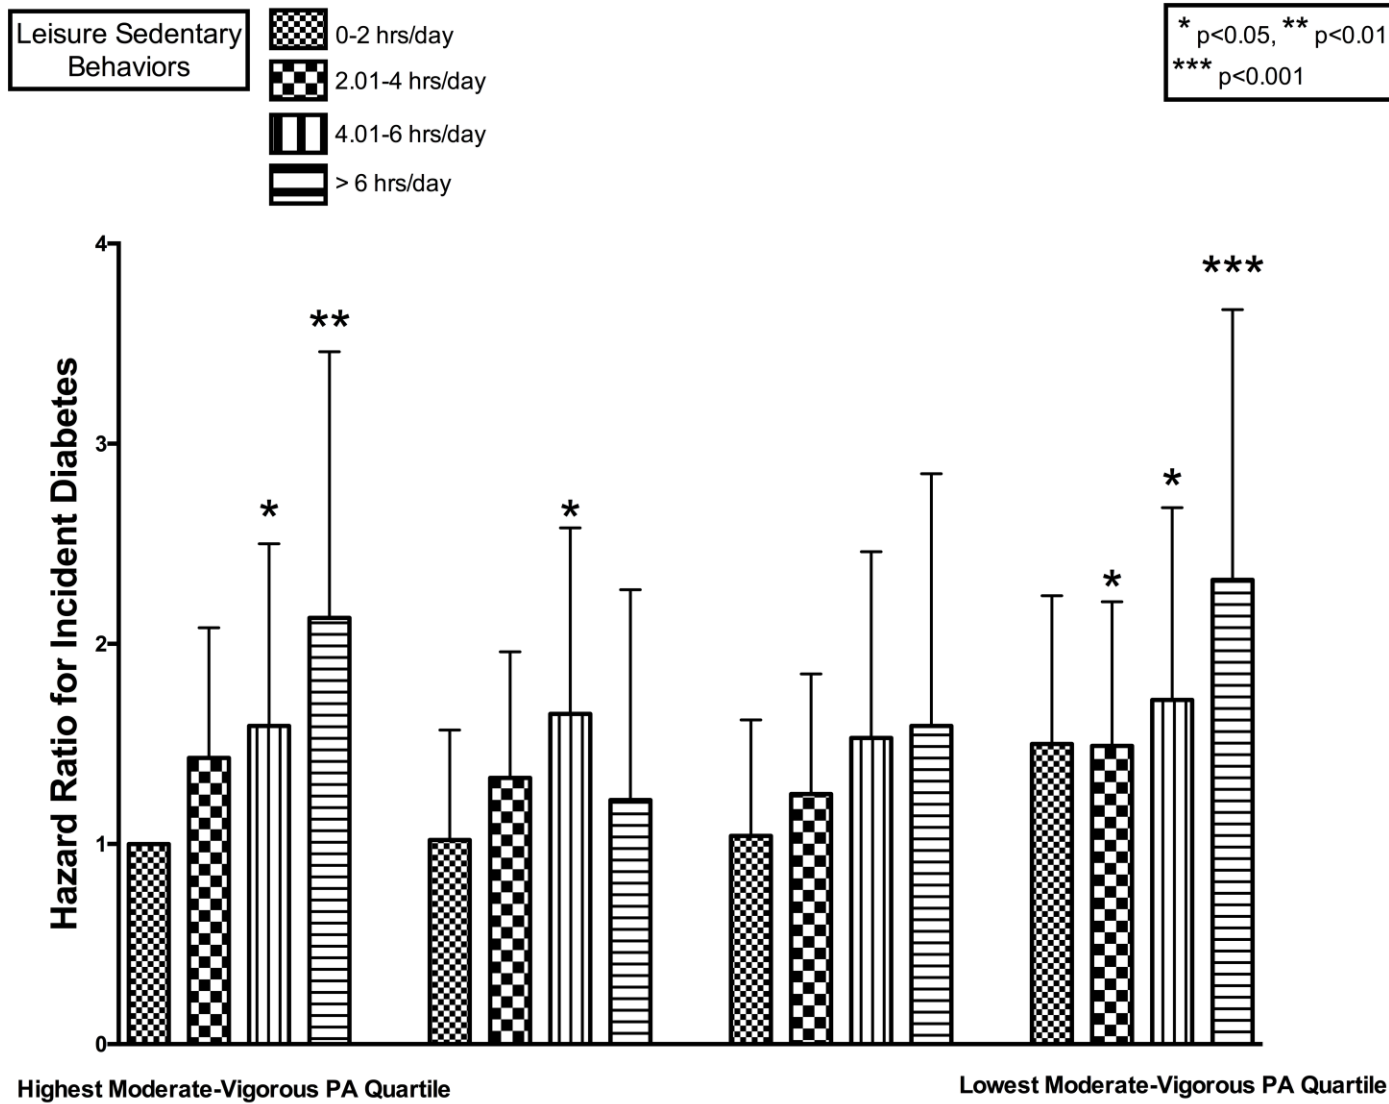

Supplementary Figure S2. The Association between (A) Physical Activity (PA) and (B) Sedentary Behaviors and Incident Type 2 Diabetes (2000-2012). Data are included for 5,829 participants followed for a median of 11.1 years. Using Cox proportional hazards modeling, we calculated the hazard ratios associated within categories of activity. Sequential modeling was conducted with Model 1 including the activity variable of interest, study site, age, race, sex, education, current occupation status, systolic blood pressure, antihypertensive medication use, and smoking. Model 2 included model 1 variables plus BMI. Activity score was created by coding quartiles of moderate to vigorous physical activity 1 (lowest quartile) to 4 (highest quartile) and reverse coding leisure sedentary behavior 3 (lowest quartile) to 0 (highest quartile). \* $p < 0.05$ , \*\* $p < 0.01$  and \*\*\* $p < 0.001$  versus the referent category in each domain of physical activity, sedentary behavior and activity score.

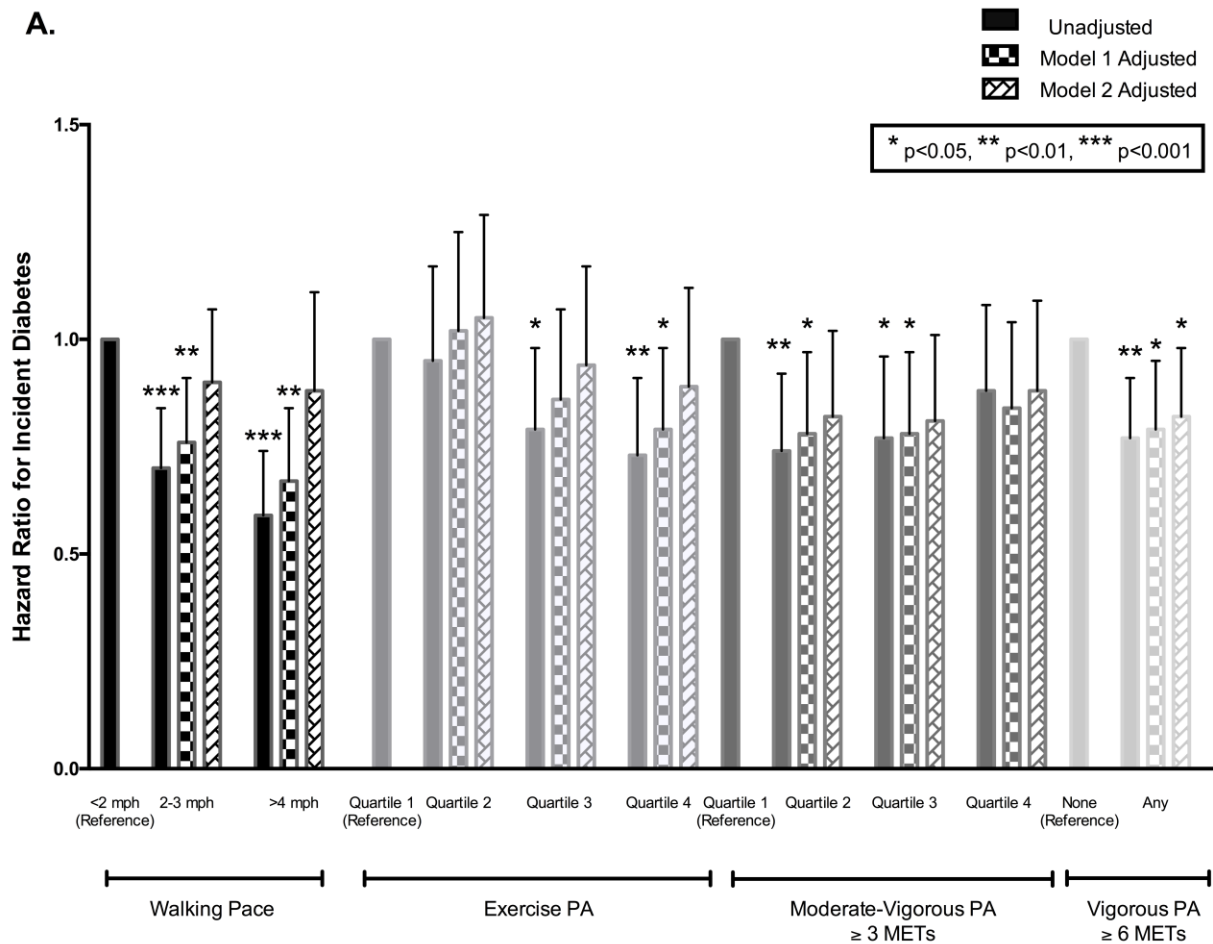

**B.**

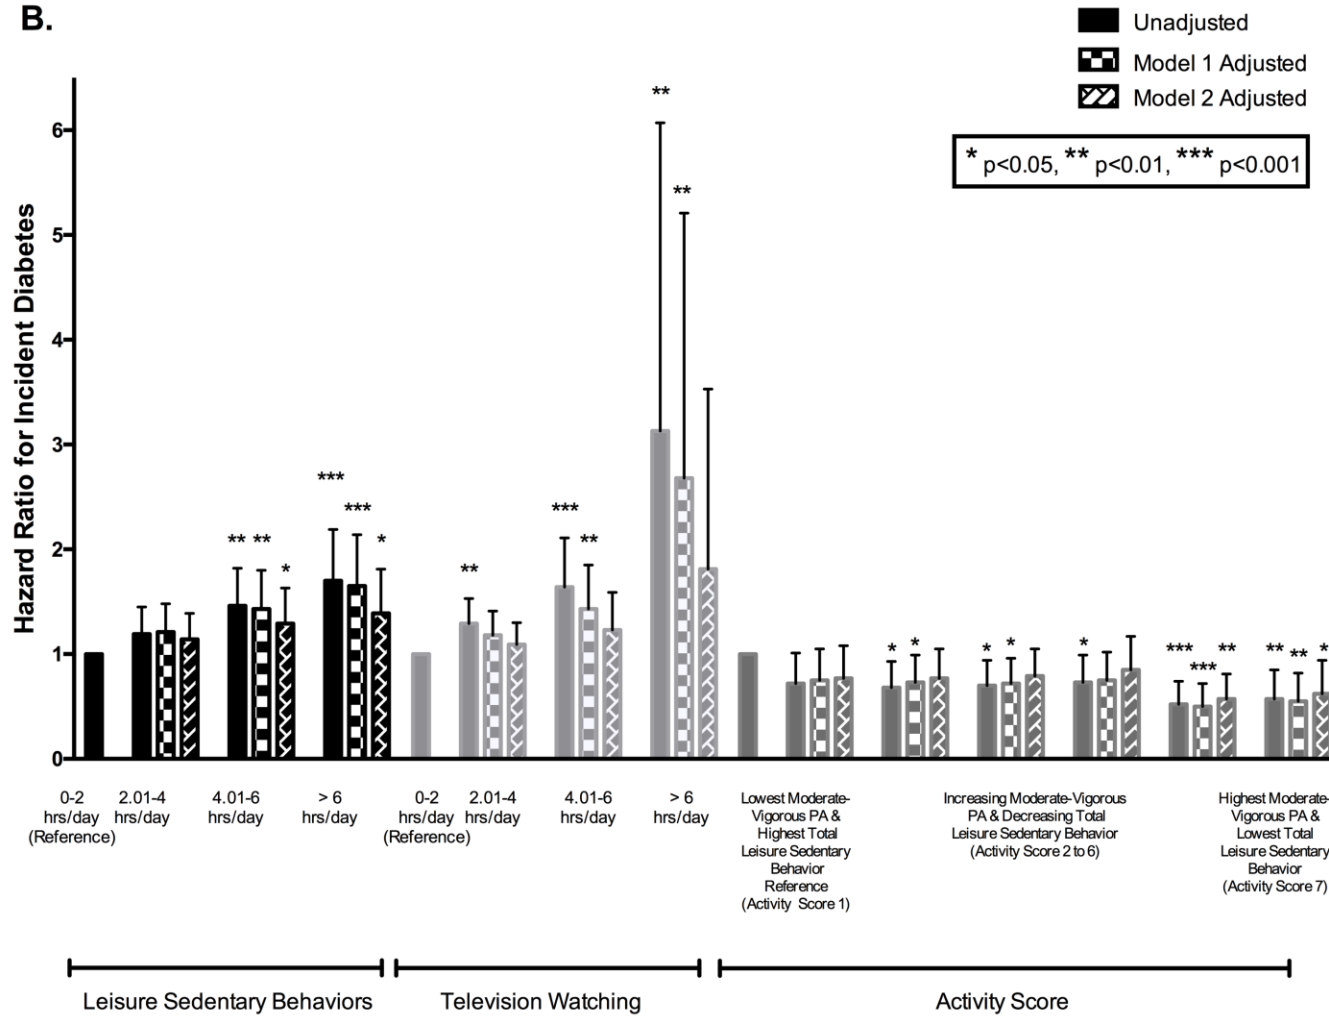

Supplementary Figure S3. Activity Score and Incident Type 2 Diabetes Mellitus by race/ethnicity from 2000-2012. Data are included for 5,829 participants followed for a median of 11.1 years. Using Cox proportional hazards modeling, we calculated the hazard ratios associated with increasing PA score using a PA score of 1 (low moderate-vigorous PA, high total leisure sedentary behavior) as the referent category in each race/ethnicity. The model included the PA score, study site, age, sex, education, current occupation status, systolic blood pressure, antihypertensive medication use, and smoking. \* $p < 0.05$ , \*\* $p < 0.01$  and \*\*\* $p < 0.001$  versus the referent category. P for trend was calculated using the log-rank test. § Activity score was created by coding quartiles of moderate to vigorous physical activity 1 (lowest quartile) to 4 (highest quartile) and reverse coding leisure sedentary behavior 3 (lowest quartile) to 0 (highest quartile). Incident Rates for Activity score provided in Supplementary Table S5.

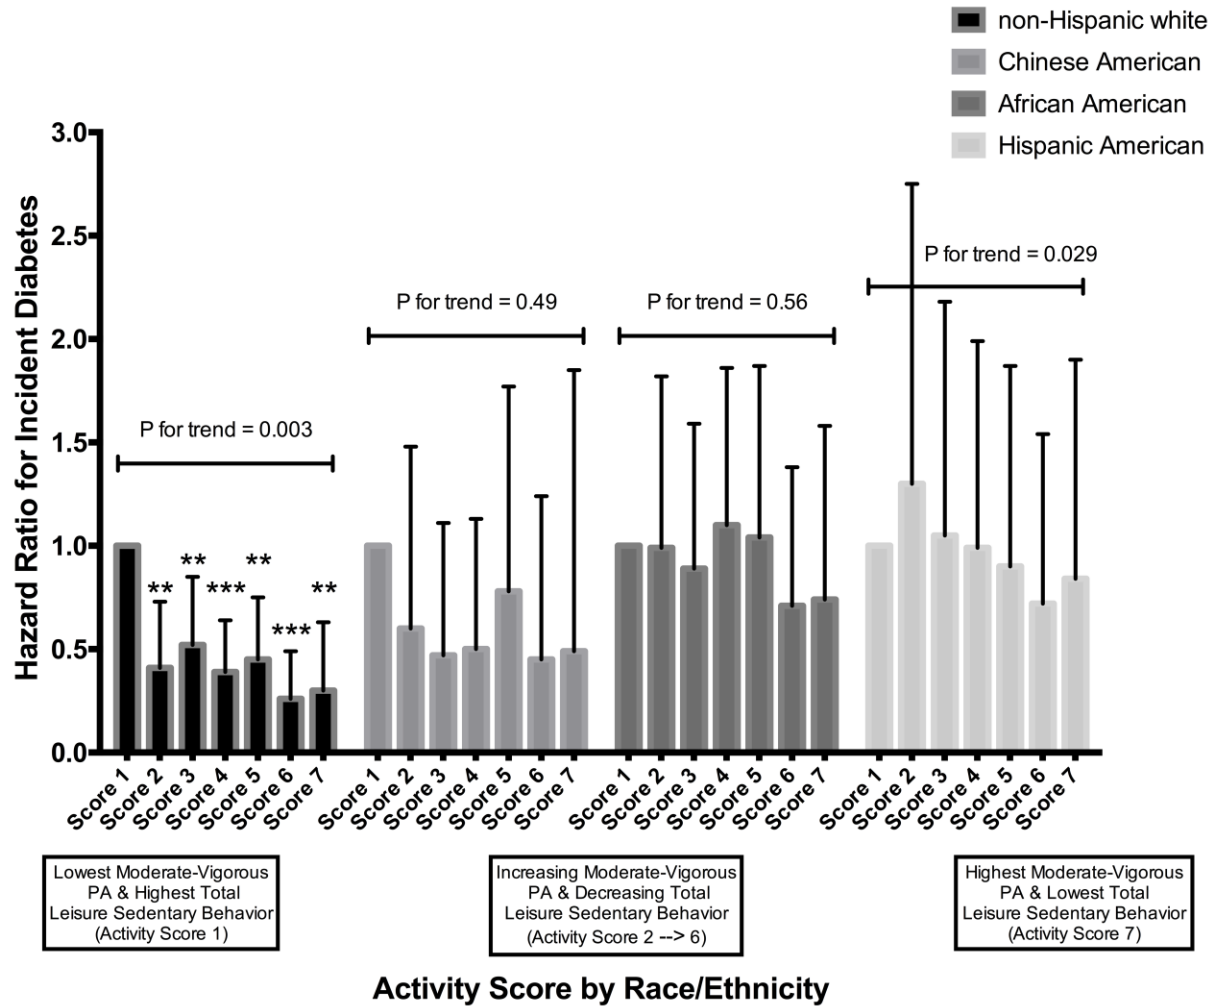

Supplement: inline-supplementary-material-1 [file inline-supplementary-material-1.pdf]
